# Supplementary material for: Online Well-Being Group Coaching Program for Women Physician Trainees: A Randomized Clinical Trial
Source: PubMed Central journal article supplement (PMC10551770; doi:10.1001/jamanetworkopen.2023.35541), 2023-10-04
Supplement: jamanetwopen-e2335541-s003.pdf [file jamanetwopen-e2335541-s003.pdf]

## Data Sharing Statement

### Data

**Data available:** Yes

**Data types:** Deidentified participant data

**How to access data:** [tyra.fainstad@cuanschultz.edu](mailto:tyra.fainstad@cuanschultz.edu)

**When available:** With publication

### Supporting Documents

**Document types:** Statistical/analytic code, Informed consent form

**How to access documents:** [tyra.fainstad@cuanschultz.edu](mailto:tyra.fainstad@cuanschultz.edu)

**When available:** With publication

### Additional Information

**Who can access the data:** researchers whose proposed use of the data has been approved

**Types of analyses:** for a specified research purpose

**Mechanisms of data availability:** with a signed data access agreement
